# Supplementary material for: Atomic and vibrational origins of mechanical toughness in bioactive cement during setting
Source: PubMed Central journal article supplement (PMC4659834; doi:10.1038/ncomms9631), 2015-11-09
Supplement: ncomms9631-s1.pdf [file ncomms9631-s1.pdf]

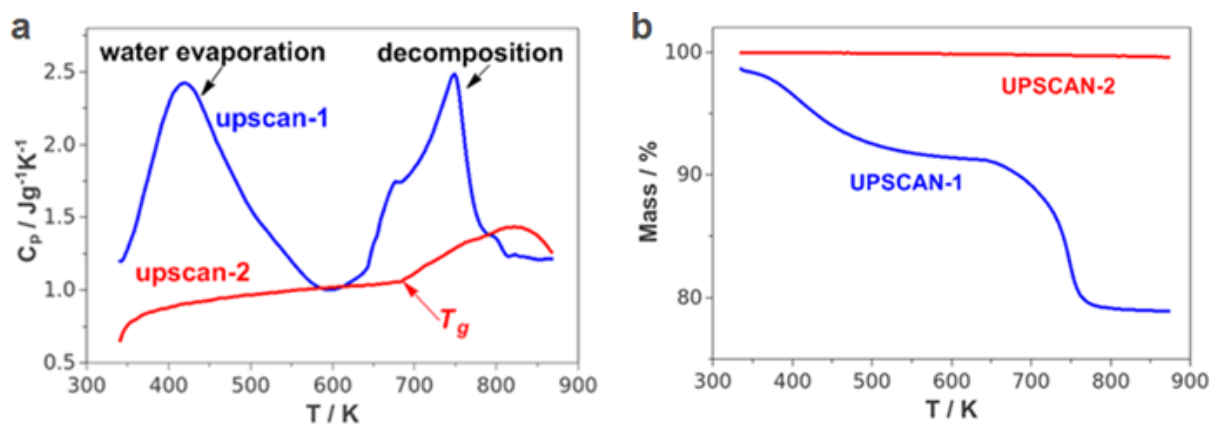

**Supplementary Figure 1** | **a**: Isobaric heat capacity ( $C_p$ ) (**a**) and mass change (**b**) as functions of temperature for the GIC sample after 62 hours setting, showing release of water and organic components.

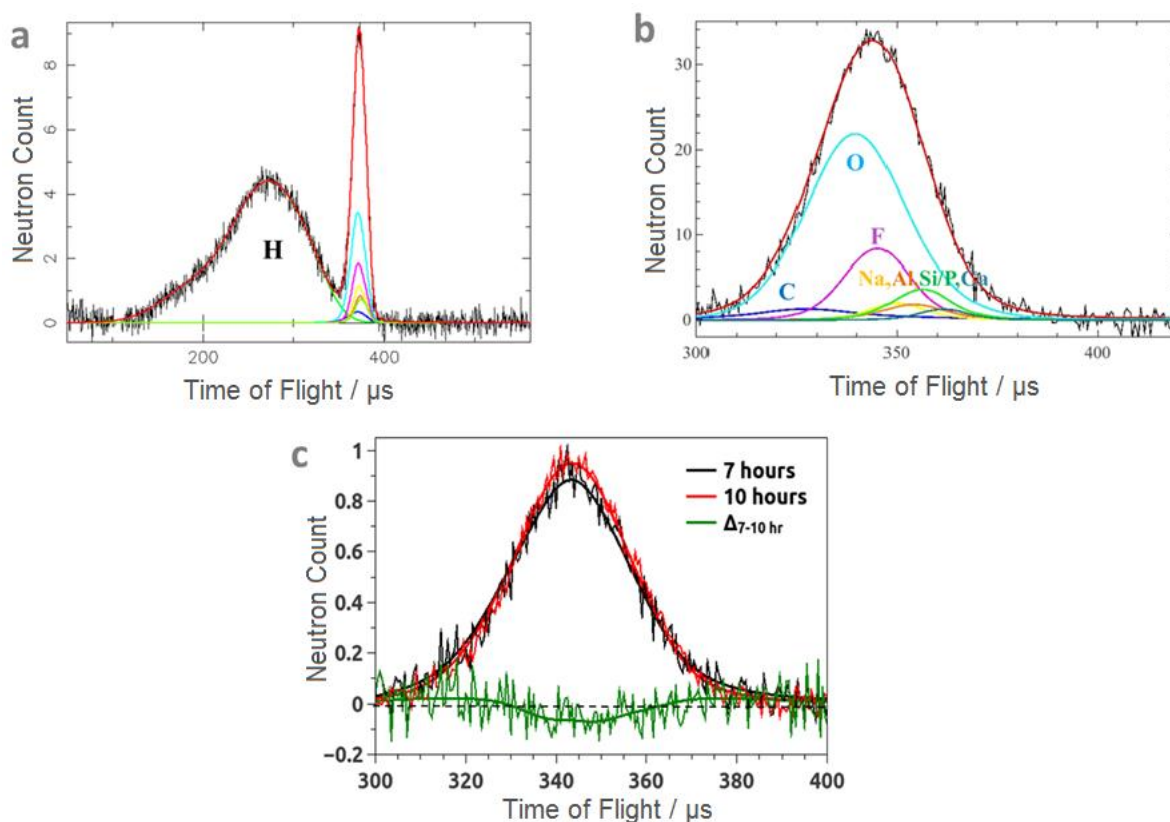

**Supplementary Figure 2** | **a**, Example of forward scattering ToF data deconvoluted into elemental contributions by mass, each weighted by the stoichiometry. **b**, Corresponding backscattering peaks. **c**, NCS profiles (raw and fit data) of the total cement envelope at 7 and 10 hours, after initiation of setting; difference spectrum (raw and fitted data) is shown in green.

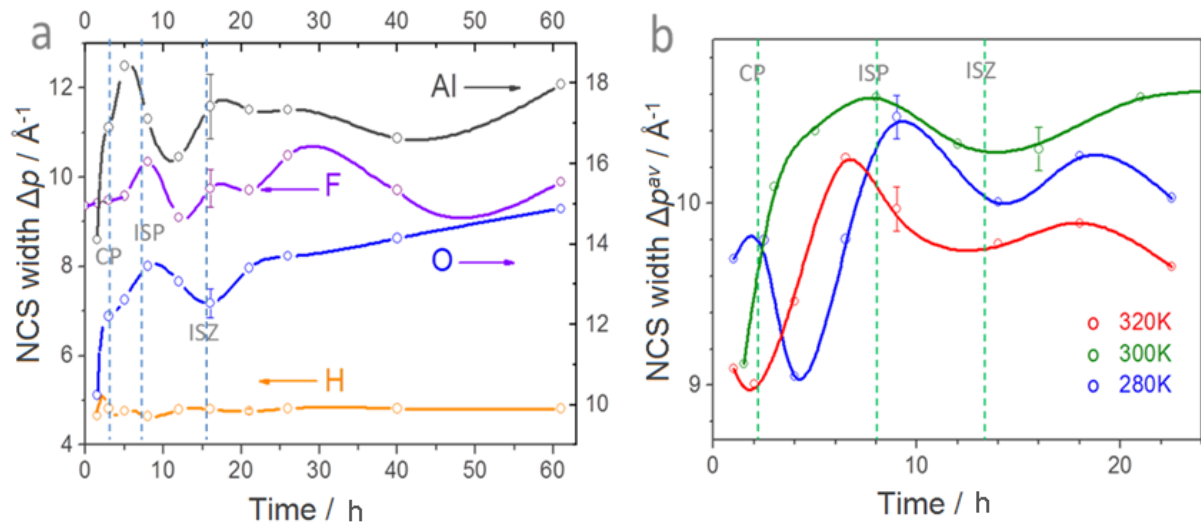

**Supplementary Figure 3** | **a**, Elemental NCS peak widths  $\Delta p_i$  for H, O, F and Al. **b**, Average NCS peak widths  $\sum_i c_i \Delta p_i$  for setting at 280 K, 300 K and 320 K, where  $c_i$  is the elemental atomic fraction. CP-coupling point, ISP-initial setting point, ISZ-intermediate stress zone; corresponding to early composite setting stages from Fig. 3.

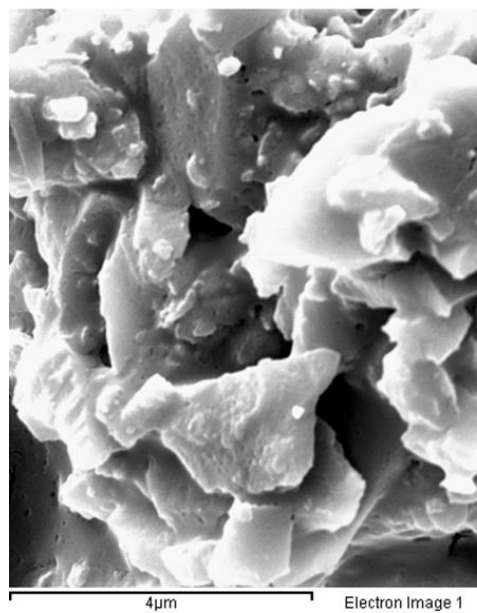

**Supplementary Figure 4** | SEM image of cement glass particles showing fractured surfaces.

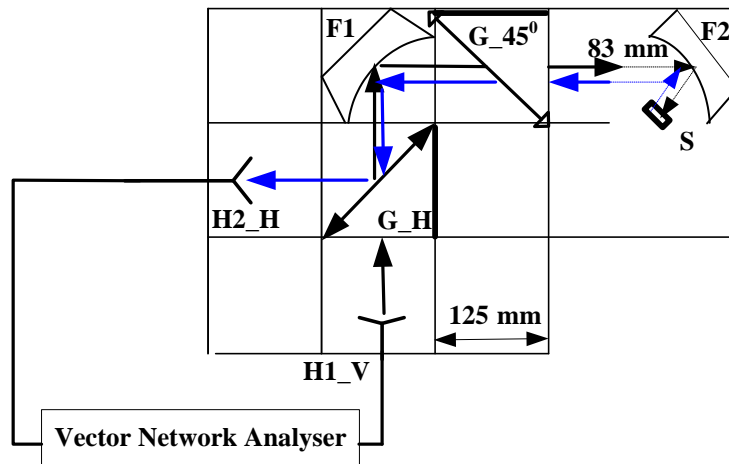

**Supplementary Figure 5** | Schematic diagram of the quasi-optical transmissometer. H1 and H2 denote a pair of corrugated feed-horns transceiver and the latter capital letter V and H present the linearly-vertical and horizontal polarised electric fields, respectively; F1, is an ellipsoidal reflector with focal length 250 mm and F2, a spherical mirror with focal length 83 mm; G\_H presents a wire-grid with horizontal polarization and G\_45<sup>0</sup> stands for a wire-grid with 45<sup>0</sup> polarization and S is the sample under test.

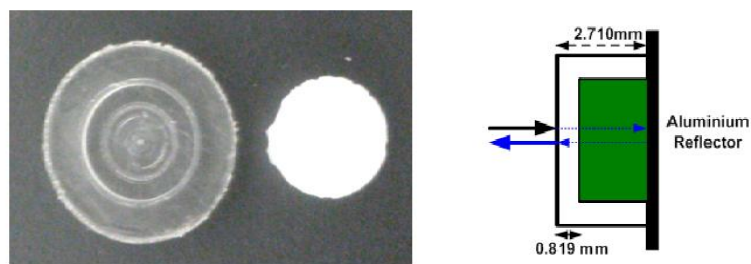

**Supplementary Figure 6** | (left) Real TPX<sup>®</sup> cap and GIC; (right) the schematic plot of TPX<sup>®</sup> cap and the samples under the test are fully filled in the green area.
